# Supplementary material
Source: HighWire-hosted journal article supplement (http://d2538ggaoe6cji.cloudfront.net/highwire/filestream/45507/field_highwire_adjunct_files/2/143420-3.pdf)
Supplement: 143420-3.pdf [file 143420-3.pdf]

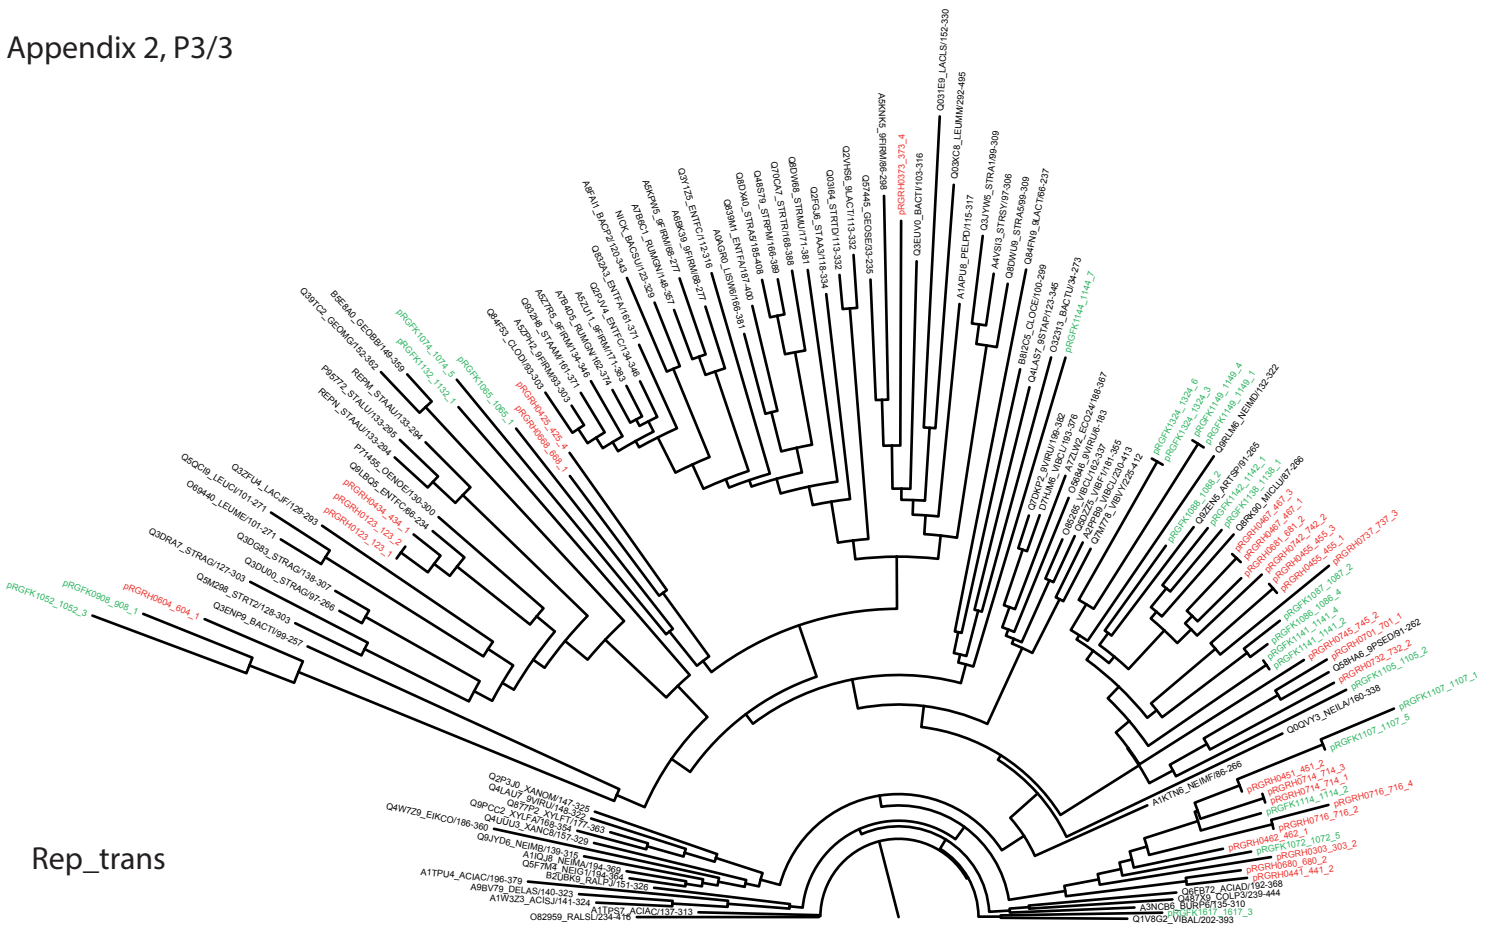

0.3

Rep\_trans
